# Supplementary material
Source: publisher site journal article supplement (https://www.dovepress.com/article/364812)
Supplement: Supplementary file 1 [file get_supplementary_file.php]

|  |  | **Dependent** | | | | | | | | |
| --- | --- | --- | --- | --- | --- | --- | --- | --- | --- | --- |
| **Predictor** |  | **Heart failure** | **CAD** | **PAD** | **Hypertension** | **Sleep Apnea** | **Hyperlipidemia** | **Diabetes mellitus** | **Osteoporosis** | **Hyperuricemia** |
| **Visit 2** | Estimate | 0.207 | 0.016 | 0.058 | 0.056 | 0.140 | 0.177 | 0.170 | 0.071 | 0.106 |
| 95%CI | 0.056; 0.358 | -0.027; 0.059 | -0.016; 0.132 | 0.015; 0.098 | 0.055; 0.225 | 0.117; 0.238 | 0.075; 0.265 | 0.015; 0.128 | 0.040; 0.171 |
| p value | **0.007** | 0.461 | 0.125 | **0.007** | **0.001** | **<0.001** | **<0.001** | **0.013** | **0.002** |
| **Visit 3** | Estimate | 0.333 | 0.096 | 0.108 | 0.104 | 0.264 | 0.245 | 0.250 | 0.113 | 0.219 |
| 95%CI | 0.123; 0.542 | 0.013; 0.178 | 0.001; 0.215 | 0.041; 0.166 | 0.150; 0.378 | 0.171; 0.320 | 0.127; 0.374 | 0.029; 0.198 | 0.120; 0.319 |
| p value | **0.002** | **0.023** | **0.048** | **0.001** | **<0.001** | **<0.001** | **<0.001** | **0.009** | **<0.001** |
| **Visit 4** | Estimate | 0.526 | 0.129 | 0.133 | 0.134 | 0.334 | 0.344 | 0.314 | 0.236 | 0.320 |
| 95%CI | 0.272; 0.781 | 0.012; 0.246 | -0.006; 0.272 | 0.049; 0.219 | 0.192; 0.475 | 0.247; 0.441 | 0.154; 0.474 | 0.105; 0.368 | 0.186; 0.455 |
| p value | **<0.001** | **0.031** | 0.061 | **0.002** | **<0.001** | **<0.001** | **<0.001** | **<0.001** | **<0.001** |
| **Visit 5** | Estimate | 0.654 | 0.197 | 0.152 | 0.129 | 0.430 | 0.380 | 0.358 | 0.330 | 0.454 |
| 95%CI | 0.353; 0.955 | 0.049; 0.345 | -0.015; 0.319 | 0.023; 0.235 | 0.261; 0.598 | 0.265; 0.495 | 0.153; 0.563 | 0.166; 0.494 | 0.281; 0.626 |
| p value | **<0.001** | **0.009** | 0.075 | **0.017** | **<0.001** | **<0.001** | **0.001** | **<0.001** | **<0.001** |
| **Age** | Estimate | 0.255 | 0.263 | 0.341 | 0.216 | 0.048 | 0.161 | 0.172 | 0.124 | 0.101 |
| 95%CI | 0.107; 0.403 | 0.156; 0.370 | 0.211; 0.471 | 0.137; 0.295 | -0.066; 0.161 | 0.082; 0.239 | 0.027; 0.316 | 0.021; 0.228 | -0.004; 0.206 |
| p value | **0.001** | **<0.001** | **<0.001** | **<0.001** | 0.411 | **<0.001** | **0.020** | **0.019** | 0.059 |
| **Female** | Estimate | -0.361 | -0.886 | -0.218 | -0.279 | -0.802 | -0.067 | -0.960 | 1.295 | -1.070 |
| 95%CI | -0.924; 0.202 | -1.293; -0.479 | -0.638; 0.201 | -0.548; -0.010 | -1.242; -0.362 | -0.334; 0.200 | -1.447; -0.474 | 0.923; 1.667 | -1.463; -0.677 |
| p value | 0.209 | **<0.001** | 0.307 | **0.042** | **<0.001** | 0.621 | **<0.001** | **<0.001** | **<0.001** |
| **BMI** | Estimate | -0.039 | 0.059 | 0.053 | 0.060 | 0.306 | 0.055 | 0.139 | -0.013 | 0.177 |
| 95%CI | -0.234; 0.155 | -0.067; 0.184 | -0.055; 0.161 | -0.034; 0.154 | 0.176; 0.437 | -0.034; 0.145 | 0.029; 0.249 | -0.108; 0.081 | 0.067; 0.287 |
| p value | 0.692 | 0.359 | 0.336 | 0.211 | **<0.001** | 0.224 | **0.013** | 0.783 | **0.002** |
| **Smoking** | Estimate | -0.121 | 0.061 | 0.106 | -0.098 | -0.013 | 0.086 | -0.124 | -0.057 | -0.055 |
| 95%CI | -0.561; 0.319 | -0.156; 0.279 | -0.206; 0.417 | -0.241; 0.044 | -0.275; 0.250 | -0.033; 0.205 | -0.429; 0.181 | -0.231; 0.117 | -0.299; 0.190 |
| p value | 0.591 | 0.581 | 0.506 | 0.177 | 0.925 | 0.156 | 0.424 | 0.523 | 0.662 |
| **Exacerbations** | Estimate | 0.126 | 0.129 | -0.106 | 0.006 | -0.010 | 0.037 | -0.033 | 0.054 | 0.048 |
| 95%CI | -0.035; 0.286 | 0.034; 0.223 | -0.193; -0.018 | -0.049; 0.060 | -0.098; 0.077 | -0.031; 0.106 | -0.152; 0.086 | -0.038; 0.146 | -0.043; 0.140 |
| p value | 0.124 | **0.008** | **0.018** | 0.837 | 0.814 | 0.285 | 0.590 | 0.247 | 0.298 |
| **Symptoms** | Estimate | 0.164 | 0.105 | 0.091 | 0.023 | 0.067 | 0.002 | -0.030 | -0.023 | 0.062 |
| 95%CI | -0.050; 0.378 | 0.004; 0.206 | -0.017; 0.198 | -0.063; 0.108 | -0.040; 0.174 | -0.072; 0.075 | -0.108; 0.049 | -0.121; 0.074 | -0.034; 0.158 |
| p value | 0.133 | **0.042** | 0.098 | 0.604 | 0.217 | 0.967 | 0.459 | 0.643 | 0.207 |
| **VAS**  **of EQ-5D-3L** | Estimate | -0.196 | -0.030 | -0.075 | -0.017 | -0.052 | -0.012 | 0.056 | 0.029 | -0.020 |
| 95%CI | -0.327; -0.065 | -0.080; 0.021 | -0.140; -0.010 | -0.052; 0.019 | -0.110; 0.006 | -0.054; 0.031 | -0.022; 0.133 | -0.022; 0.080 | -0.083; 0.043 |
| p value | **0.003** | 0.250 | **0.024** | 0.350 | 0.079 | 0.588 | 0.158 | 0.269 | 0.535 |
| **FEV₁ %predicted** | Estimate | -0.050 | 0.009 | -0.051 | -0.005 | 0.030 | 0.040 | -0.009 | -0.024 | 0.044 |
| 95%CI | -0.147; 0.048 | -0.037; 0.055 | -0.100; -0.001 | -0.055; 0.046 | -0.024; 0.084 | 0.004; 0.076 | -0.104; 0.086 | -0.074; 0.026 | -0.035; 0.123 |
| p value | 0.318 | 0.709 | **0.046** | 0.848 | 0.280 | **0.031** | 0.854 | 0.346 | 0.276 |

# Supplemental Table S1

Results from generalized logistic models with repeated-measures design and logit link. Dependent variables are given in the headline and the results for the set of predictors in the corresponding columns below. Estimates (regression coefficients for logit link), 95% confidence intervals (95%CI) and p values are given. The coefficients for visits are relative to the values at visit 1. Odds ratios can be computed by exponentiation (base e) of the coefficients. Exacerbations refer to GOLD CD versus AB, symptoms to GOLD BD versus AC, smoking to active versus never or ex-smoker. The other regression coefficients refer to age per 5 years, BMI per 5 kg/m2, VAS per 20 units and FEV1 % predicted per 10% change. CAD = coronary artery disease; PAD = peripheral artery disease; VAS of EQ-5D-3L = visual analog scale of the EQ-5D 3L questionnaire; FEV1 = forced expiratory volume in 1 second; GOLD = Global Initiative for Chronic Obstructive Lung Disease. The results of the table are illustrated in Figure 2. P values of statistically significant associations (p<0.05) are marked in boldface.
